# Supplementary material for: The Neurotransmitter Receptor Architecture of the Mouse Olfactory System
Source: Front Neuroanat. 2021 Apr 23;15:632549. doi: 10.3389/fnana.2021.632549 (PMC8102831; doi:10.3389/fnana.2021.632549)
Supplement: Supplementary file 2 [file Table_2.xlsx]

## Sheet: Tabelle1
Supp. Tab. 2: Significant differences between receptor densities between the olfactory areas. Each receptor type was tested with pairwise Dunn-Bonferroni post hoc test if the Friedman ANOVA showed regional differences inbetween the areas. Significance (Sig., p-value) and adjusted significance (Adj. Sig., p-value multiplied by the number of tests carried out) labelled p < 0.05
	AMPA		Kainate		NMDA		mGlu2/3		GABAA		GABAA(BZ)		GABAB		α1		α2		D1/5
	Sig	Adj. Sig	Sig	Adj. Sig	Sig	Adj. Sig	Sig	Adj. Sig	Sig	Adj. Sig	Sig	Adj. Sig	Sig	Adj. Sig	Sig	Adj. Sig	Sig	Adj. Sig	Sig	Adj. Sig
MOB-Epd	.748	1000	.098	1000	.392	1000	.748	1000	.708	1000	.121	1000	.022	1000	.000	.000	.001	.122	.000	.000
MOB-AOB	.149	1000	.612	1000	.310	1000	.000	.001	.378	1000	.001	.069	.121	1000	.630	1000	.423	1000	.219	1000
MOB-ORBvl	.037	1000	.054	1000	.000	.002	.000	.000	.000	.000	.022	1000	.000	.000	.575	1000	.487	1000	.219	1000
MOB-AON	.033	1000	.121	1000	.042	1000	.454	1000	.285	1000	.012	1000	.016	1000	.001	.092	.000	.000	.054	1000
MOB-OT	.010	.937	.016	1000	.016	1000	.000	.000	.557	1000	.219	1000	.392	1000	.000	.000	.061	1000	.000	.000
MOB-ORBl	.009	.802	.364	1000	.000	.000	.000	.002	.000	.000	.008	.685	.000	.000	.688	1000	.134	1000	.025	1000
MOB-PIR	.008	.685	.000	.021	.002	.176	.000	.038	.054	1000	.364	1000	.000	.031	.181	1000	.001	.122	.001	.101
MOB-DP	.005	.420	.042	1000	.000	.017	.000	.017	.028	1000	.262	1000	.000	.007	.000	.015	.002	.147	.000	.000
MOB-ORBm	.002	.210	.240	1000	.000	.001	.000	.001	.000	.021	.134	1000	.000	.017	.708	1000	.593	1000	.002	.161
MOB-TTd	.000	.025	.487	1000	.000	.031	.048	1000	.262	1000	.748	1000	.000	.031	.000	.007	.000	.000	.000	.001
MOB-TTv	.000	.000	.054	1000	.004	.355	.061	1000	.979	1000	.630	1000	.005	.420	.000	.013	.000	.013	.001	.057
MOB-ENTm	.000	.000	.082	1000	.000	.007	.011	1000	.008	.685	.200	1000	.000	.000	.000	.013	.000	.000	.000	.000
MOB-ENTl	.000	.000	.098	1000	.000	.000	.003	.299	.000	.023	.134	1000	.000	.000	.000	.031	.000	.000	.000	.000
Epd-AOB	.262	1000	.250	1000	.873	1000	.000	.000	.209	1000	.000	.000	.454	1000	.000	.000	.016	1000	.000	.000
Epd-ORBvl	.078	1000	.915	1000	.001	.057	.000	.000	.000	.000	.000	.011	.002	.210	.000	.004	.012	1000	.000	.000
Epd-AON	.069	1000	.915	1000	.240	1000	.285	1000	.487	1000	.336	1000	.915	1000	.173	1000	.016	1000	.000	.001
Epd-OT	.025	1000	.000	.004	.121	1000	.000	.000	.336	1000	.748	1000	.149	1000	.454	1000	.181	1000	.000	.000
Epd-ORBl	.022	1000	.010	.932	.000	.001	.000	.000	.000	.000	.000	.002	.001	.047	.000	.002	.087	1000	.000	.004
Epd-PIR	.019	1000	.000	.000	.025	1000	.000	.011	.022	1000	.014	1000	.200	1000	.001	.084	1000	1000	.002	.210
Epd-DP	.012	1000	.708	1000	.004	.355	.000	.004	.010	.937	.008	.685	.098	1000	.378	1000	.957	1000	.957	1000
Epd-ORBm	.006	.583	.005	.420	.000	.021	.000	.000	.000	.004	.002	.210	.149	1000	.000	.002	.008	.685	.001	.134
Epd-TTd	.001	.084	.336	1000	.006	.583	.022	1.00	.134	1000	.061	1000	.200	1000	.487	1000	.078	1000	.051	1000
Epd-TTv	.000	.000	.000	.031	.042	1000	.028	1000	.688	1000	.285	1000	.593	1000	.392	1000	.557	1000	.004	.355
Epd-ENTm	.000	.000	.001	.063	.002	.176	.004	.386	.002	.210	.109	1000	.000	.007	.392	1000	.022	1000	.098	1000
Epd-ENTl	.000	.000	.001	.084	.000	.000	.001	.101	.000	.005	.069	1000	.001	.057	.285	1000	.019	1000	.121	1000
AOB-ORBvl	.521	1000	.015	1000	.001	.101	.669	1000	.000	.021	.285	1000	.000	.013	.297	1000	.915	1000	.748	1000
AOB-AON	.487	1000	.297	1000	.310	1000	.000	.025	.051	1000	.000	.000	.392	1000	.000	.015	.000	.000	.310	1000
AOB-OT	.262	1000	.004	.326	.165	1000	.000	.006	.769	1000	.000	.000	.487	1000	.000	.000	.285	1000	.000	.000
AOB-ORBl	.240	1000	.157	1000	.000	.001	.915	1000	.000	.008	.487	1000	.000	.002	.378	1000	.487	1000	.181	1000
AOB-PIR	.219	1000	.000	.002	.285	1000	.392	1000	.297	1000	.014	1000	.042	1000	.069	1000	.016	1000	.019	1000
AOB-DP	.165	1000	.128	1000	.006	.583	.521	1000	.190	1000	.025	1000	.016	1000	.000	.002	.019	1000	.000	.009
AOB-ORBm	.109	1000	.092	1000	.000	.038	.979	1000	.005	.456	.061	1000	.028	1000	.392	1000	.789	1000	.027	1000
AOB-TTd	.028	1000	.852	1000	.010	.937	.016	1000	.810	1000	.002	.210	.042	1000	.000	.001	.000	.003	.001	.051
AOB-TTv	.000	.011	.015	1000	.061	1000	.012	1000	.392	1000	.000	.011	.200	1000	.000	.002	.003	.251	.012	1000
AOB-ENTm	.000	.002	.025	1000	.003	.299	.065	1000	.073	1000	.001	.084	.000	.000	.000	.002	.000	.000	.000	.017
AOB-ENTl	.000	.000	.030	1000	.000	.000	.149	1000	.005	.495	.002	.176	.000	.003	.000	.004	.000	.000	.000	.011
ORBvl-AON	.957	1000	.001	.047	.025	1000	.000	.004	.000	.000	.000	.000	.003	.299	.006	.583	.000	.000	.487	1000
ORBvl-OT	.630	1000	.630	1000	0.61	1000	.957	1000	.002	.183	.000	.038	.000	.001	.000	.000	.240	1000	.000	.000
ORBvl-ORBl	.593	1000	.310	1000	.285	1000	.593	1000	.810	1000	.708	1000	.669	1000	.873	1000	.423	1000	.310	1000
ORBvl-PIR	.557	1000	.078	1000	.240	1000	.200	1000	.008	.741	.165	1000	.078	1000	.438	1000	.012	1000	.042	1000
ORBvl-DP	.454	1000	.000	.007	.593	1000	.285	1000	.017	1000	.240	1000	.165	1000	.001	.122	.014	1000	.000	.031
ORBvl-ORBm	.336	1000	.454	1000	.789	1000	.023	1000	.378	1000	.423	1000	.109	1000	.852	1000	.873	1000	.058	1000
ORBvl-TTd	.121	1000	.009	.802	.487	1000	.005	.420	.001	.051	.048	1000	.078	1000	.001	.063	.000	.002	.002	.161
ORBvl-TTv	.001	.122	1000	1000	.165	1000	.003	.299	.000	.001	.005	.495	.012	1000	.001	.111	.002	.176	.028	1000
ORBvl-ENTm	.000	.025	.852	1000	.748	1000	.688	1000	.058	1000	.025	1000	.364	1000	.001	.111	.000	.000	.001	.057
ORBvl-ENTl	.000	.007	.789	1000	.033	1000	.061	1000	.364	1000	.042	1000	.708	1000	.003	.230	.000	.000	.000	.038
AON-OT	.669	1000	.000	.007	.708	1000	.000	.006	.098	1000	.200	1000	.121	1000	.035	1000	.000	.017	.000	.000
AON-ORBl	.630	1000	.014	1000	.001	0.84	.000	.038	.000	.000	.000	.000	.001	.069	.004	.355	.000	.004	.748	1000
AON-PIR	.593	1000	.000	.000	.285	1000	.005	.495	.003	.251	.001	.057	.240	1000	.051	1000	.016	1000	.181	1000
AON-DP	.487	1000	.128	1000	.087	1000	.003	.251	.001	.101	.000	.025	.121	1000	.630	1000	.014	1000	.004	.355
AON-ORBm	.364	1000	.006	.583	.012	1000	.000	.023	.000	.000	.000	.006	.181	1000	.004	.326	.000	.000	.229	1000
AON-TTd	.134	1000	.392	1000	.121	1000	.219	1000	.028	1000	.005	.420	.240	1000	.504	1000	.521	1000	.015	1000
AON-TTv	.002	.147	.001	.047	.392	1000	.262	1000	.273	1000	.042	1000	.669	1000	.612	1000	.069	1000	.134	1000
AON-ENTm	.000	.031	.001	.092	.054	1000	.073	1000	.000	.017	.010	.937	.000	.011	.612	1000	.915	1000	.006	.583
AON-ENTl	.000	.009	.001	.122	.000	.001	.028	1000	.000	.000	.005	.495	.001	.084	.769	1000	.957	1000	.005	.420
OT-ORBl	.957	1000	.134	1000	.003	.299	.630	1000	.000	.002	.000	.009	.000	.000	.000	.000	.708	1000	.000	.000
OT-PIR	.915	1000	.200	1000	.487	1000	.219	1000	.181	1000	.033	1000	.006	.583	.000	.004	.181	1000	.000	.025
OT-DP	.789	1000	.000	.001	.181	1000	.310	1000	.109	1000	.019	1000	.002	.176	.103	1000	.200	1000	.037	1000
OT-ORBm	.630	1000	.219	1000	.033	1000	.728	1000	.002	.176	.006	.583	.004	.355	.000	.000	.181	1000	.000	.015
OT-TTd	.285	1000	.002	.176	.240	1000	.005	.495	.593	1000	.121	1000	.006	.583	.149	1000	.002	.176	.011	1000
OT-TTv	.006	.583	.630	1000	.630	1000	.004	.355	.575	1000	.454	1000	.048	1000	.109	1000	.054	1000	.001	.047
OT-ENTm	.002	.147	.504	1000	.121	1000	.027	1000	.037	1000	.200	1000	.000	.000	.109	1000	.000	.025	.025	1000
OT-ENTl	.001	.047	.454	1000	.000	.006	.069	1000	.002	.176	.134	1000	.000	.000	.069	1000	.000	.021	.033	1000
ORBl-PIR	.957	1000	.005	.495	.025	1000	.454	1000	.004	.355	.078	1000	.028	1000	.350	1000	.087	1000	.310	1000
ORBl-DP	.831	1000	.003	.299	.109	1000	.593	1000	.009	.802	.121	1000	.069	1000	.001	.069	.098	1000	.010	.937
ORBl-ORBm	.669	1000	.789	1000	.423	1000	.894	1000	.262	1000	.240	1000	.042	1000	.979	1000	.336	1000	.378	1000
ORBl-TTd	.310	1000	.109	1000	.078	1000	.022	1000	.000	.021	.019	1000	.028	1000	.000	.034	.001	.047	.035	1000
ORBl-TTv	.008	.685	.310	1000	.014	1000	.016	1000	.000	.000	.002	.147	.003	.299	.001	.063	.022	1000	.240	1000
ORBl-ENTm	.002	.176	.407	1000	.165	1000	.082	1000	.033	1000	.009	.802	.630	1000	.001	.063	.000	.006	.016	1000
ORBl-ENTl	.001	.057	.454	1000	.165	1000	.181	1000	.250	1000	.016	1000	.957	1000	.001	.134	.000	.004	.012	1000
PIR-DP	.873	1000	.000	.000	.521	1000	.831	1000	.789	1000	.831	1000	.708	1000	.015	1000	.957	1000	.121	1000
PIR-ORBm	.708	1000	.012	1000	.149	1000	.378	1000	.078	1000	.557	1000	.873	1000	.336	1000	.008	.685	.894	1000
PIR-TTd	.336	1000	.000	.001	.630	1000	.121	1000	.423	1000	.557	1000	1000	1000	.009	.802	.078	1000	.273	1000
PIR-TTv	.009	.802	.078	1000	.831	1000	.098	1000	.058	1000	.165	1000	.454	1000	.014	1000	.557	1000	.873	1000
PIR-ENTm	.002	.210	.051	1000	.392	1000	.323	1000	.454	1000	.392	1000	.008	.685	.014	1000	.022	1000	.165	1000
PIR-ENTl	.001	.069	.042	1000	.001	.084	.557	1000	.082	1000	.521	1000	.033	1000	.025	1000	.019	1000	.134	1000
DP-ORBm	.831	1000	.001	.122	.423	1000	.504	1000	.134	1000	.708	1000	.831	1000	.001	.063	.009	.802	.092	1000
DP-TTd	.423	1000	.181	1000	.873	1000	.078	1000	.285	1000	.423	1000	.708	1000	.852	1000	.069	1000	.650	1000
DP-TTv	.014	1000	.000	.007	.392	1000	.061	1000	.030	1000	.109	1000	.262	1000	.979	1000	.521	1000	.165	1000
DP-ENTm	.004	.355	.000	.015	.831	1000	.229	1000	.121	1000	.285	1000	.022	1000	.979	1000	.019	1000	.873	1000
DP-ENTl	.001	.122	.000	.021	.008	.685	.423	1000	.142	1000	.392	1000	.078	1000	.852	1000	.016	1000	.957	1000
ORBm-TTd	.557	1000	.061	1000	.336	1000	.015	1000	.010	.937	.240	1000	.873	1000	.000	.031	.000	.001	.219	1000
ORBm-TTv	.025	1000	.454	1000	.098	1000	.011	1000	.000	.023	.048	1000	.364	1000	.001	.057	.001	.101	.769	1000
ORBm-ENTm	.008	.685	.575	1000	.557	1000	.061	1000	.310	1000	.149	1000	.012	1000	.001	.057	.000	.000	.128	1000
ORBm-ENTl	.003	.251	.630	1000	.285	1000	.142	1000	.979	1000	.219	1000	.048	1000	.001	.122	.000	.000	.103	1000
TTd-TTv	.098	1000	.015	1000	.487	1000	.915	1000	.273	1000	.423	1000	.454	1000	.873	1000	.240	1000	.350	1000
TTd-ENTm	.037	1000	.015	1000	.708	1000	.575	1000	.121	1000	.789	1000	.008	.685	.873	1000	.593	1000	.769	1000
TTd-ENTl	.016	1000	.019	1000	.005	.420	.336	1000	.011	1000	.957	1000	.033	1000	.708	1000	.557	1000	.688	1000
TTv-ENTm	.669	1000	.852	1000	.285	1000	.504	1000	.008	.741	.593	1000	.001	.057	1000	1000	.087	1000	.219	1000
TTv-ENTl	.454	1000	.789	1000	.000	.038	.285	1000	.000	.025	.454	1000	.004	.355	.831	1000	.078	1000	.181	1000
ENTm-ENTl	.748	1000	.936	1000	0.14	1000	.688	1000	.323	1000	.831	1000	.593	1000	.831	1000	.957	1000	.915	1000
